# Supplementary material for: Combining sugar biosynthesis genes for the generation ofl- andd-amicetose and formation of two novel antitumor tetracenomycins
Source: Royal Society of Chemistry journal article supplement (doi:10.1039/b417815g), 2005-01-01
Supplement: b417815g.pdf [file b417815g.pdf]

**Combining sugar biosynthesis genes for the generation of  
L- and D-amicetose and formation of two novel antitumor  
tetracenomycins**

María Pérez, Felipe Lombó, Lili Zhu, Miranda Gibson, Alfredo F.  
Braña, Jürgen Rohr, José A. Salas and Carmen Méndez \*

**Supporting information**

## Microorganisms, culture conditions and vectors

*Saccharopolyspora spinosa* (spinosyn producer) was used as source of DNA. pLN2, pLNR, pLNRho and pLNBIV<sup>2c</sup> were used as sources of sugar DNA cassettes. *Streptomyces lividans* 16F4<sup>5</sup> was used as host for gene expression. Growth was carried out on trypticase soya broth (TSB; Oxoid) or R5A medium<sup>8</sup> for product isolation. For sporulation we used agar plates containing A medium<sup>8</sup> for 7 days at 30°C. *Escherichia coli* DH10B (Invitrogene) was used as a host for subcloning and was grown at 37° C in TSB medium. pCRBlunt (Invitrogene), pUC18, and pLAGO<sup>9</sup> were used as vectors for subcloning experiments and DNA sequencing. When antibiotic selection of transformants was needed, 50 µg/ml of thiostrepton, 25 µg/ml of apramycin, 50 µg/ml of kanamycin, or 100 µg/ml of ampicillin were used.

## DNA manipulation and sequencing

Plasmid DNA preparations, restriction endonuclease digestions, alkaline phosphatase treatments, ligations and other DNA manipulations were according to standard procedures for *Streptomyces*<sup>10</sup> and for *E.coli*<sup>11</sup>. Sequencing was performed by using the dideoxynucleotide chain-terminator method<sup>12</sup> and the Thermo Sequenase Labelled Primer Cycle Sequencing Kit with 7-deaza-dGTP (Amersham Biosciences). Both DNA strands were sequenced with primers supplied in the kits or with internal oligoprimers (18-mer) using an ALF-express automatic DNA sequencer (Pharmacia). Computer-assisted data base searching and sequence analyses were carried out using the University of Wisconsin Genetics Computer Group programs package<sup>13</sup> and the BLAST program<sup>14</sup>.

## PCR amplification

Primers for *spnQ* amplification, including extra *Xba*I sites at both extremes were: FL-Sq-up: 5'-**TCTAGAA**AGACTGATCGTCGCCTG-3'. FL-Sq-rp: 5'-**TCTAGACTAGGA**ACTCTTGGCCAC-3'. The resulting PCR amplicon was subcloned into plasmid pCR-blunt (Invitrogene), generating pFL838. PCR reaction conditions were as follows: 100 ng of template DNA were mixed with 30 pmols of each primer and 1.25 units of Platinum-Pfx DNA Polymerase (Invitrogene) in a total reaction volume of 50 µl containing 1 mM MgSO<sub>4</sub>, 0.3 mM of each dNTP, 1x Pfx-buffer, and in some cases PCRx Enhancer Solution. The polymerization reactions were performed in a thermocycler (PT-100, MJ Research). General conditions for PCR amplification were as follows: 2 min at 94° C; 30 cycles composed of 30 s at 94° C, 1 min at the primers annealing temperature (58° C), and 80 s at 68° C; 5 min at 68° C; and 15 min at 4° C. The PCR products were purified with GFX PCR DNA and Gel Band Purification Kit (Amersham Biosciences), subcloned into pCRBlunt and sequenced.

## Production conditions and chromatographic techniques

Spores of *S. lividans* 16F4 containing the different constructs were grown in R5A medium according to conditions previously described.<sup>2c</sup> HPLC analyses were performed as previously described.<sup>2c</sup>

## Mass spectra and NMR analysis

HPLC-MS analysis of the glycosylated compounds was carried out using a chromatographic equipment coupled to a ZQ4000 mass spectrometer (Waters-Micromass), using electrospray ionization in the positive mode, with a capillary voltage of 3 kV and a cone voltage of 20 V. Chromatographic conditions were as previously described,<sup>2c</sup> except for the column size (2.1 x 150 mm) and flow rate (0.25 ml/min).

A SymmetryPrep C18 column (7.8 x 300 mm, Waters) was used for compound purification, with acetonitrile and 0.1% trifluoroacetic acid as solvents. The new compounds were eluted in isocratic mode with 40%.

Standards with pure compounds were used for L-oliviosyl, L-digitoxosyl-, D-oliviosyl-TCM and -ELM comparisons.

## Isolation and physico-chemical characterization of the new amicetosyltetracenomycins

Final purification was achieved by semi-preparative HPLC. Semi-preparative HPLC was run on a Waters Delta 600 instrument with a Waters 996 photodiode array detector (Waters symmetry C<sub>18</sub> column, 19 x 150 mm, particle size 7 µm; solvent system: linear gradient H<sub>2</sub>O:CH<sub>3</sub>CN 80:20 to 40:60 within 30 min, flow rate 10 ml/min). HPLC/MS was performed on a Waters Alliance 2695 system with Waters 2996 photodiode array detector and a Micromass ZQ 2000 mass spectrometer equipped with an APCI ionization probe (Waters symmetry C<sub>18</sub>, 4.6 x 50 mm, particle size 5 µm; solvent system: linear gradient H<sub>2</sub>O:CH<sub>3</sub>CN = 75:25 to 30:70 within 12 min; flow rate = 0.5 mL/min).

### 8-Demethyl-8-b-D-amicetosyl-tetracenomycin C (1)

Yield: 10 mg; R<sub>rel</sub> = 4.15 min (analytical HPLC-MS)

MW = 572 g/mol (C<sub>28</sub>H<sub>28</sub>O<sub>13</sub>)

Positive mode APCI-MS (from HPLC-MS): m/z = 573 (10%, M+H)<sup>+</sup>; 459 (100%, aglycon), 441 (60%), 423 (30%), 409 (45%), 346 (100%), 313 (30%).

UV maxima (from HPLC-diode array): 250 (60%), 288 (100%), 390 (35%), 413 (35%)

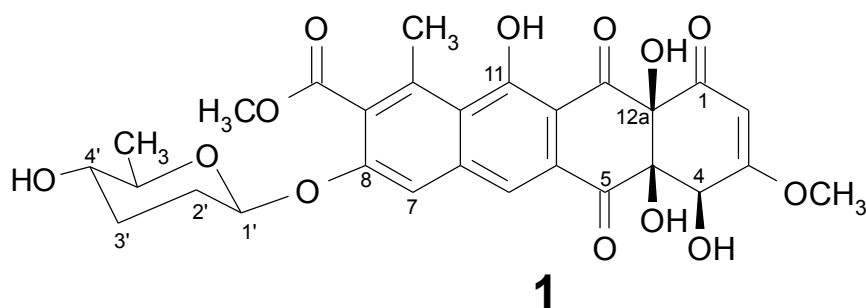

NMR data of 8-Demethyl-8-β-D-amicetosyl-tetracenomycin C (**1**). Given are d-values in ppm relative to TMS, in  $d_6$ -DMSO.

| position           | $^1\text{H}$ , 400 MHz d/ppm (multiplicity, $J/\text{Hz}$ ) | $^{13}\text{C}$ (100 MHz) |
|--------------------|-------------------------------------------------------------|---------------------------|
| 1                  |                                                             | 190.9                     |
| 2                  | 5.47 (d, $J = 1.5$ Hz)                                      | 100.6                     |
| 3                  |                                                             | 173.2                     |
| 3-OCH <sub>3</sub> | 3.70 (s)                                                    | 56.7                      |
| 4-H                | 4.77 (dd, $J = 8; 1.5$ Hz)                                  | 71.0                      |
| 4-OH               | 5.91 (d, $J = 8$ Hz)                                        |                           |
| 4a                 |                                                             | 87.4 <sup>a</sup>         |
| 4a-OH              | 5.55 (s)                                                    |                           |
| 5                  |                                                             | 191.4 <sup>b</sup>        |
| 5a                 |                                                             | 139.8                     |
| 6                  | 7.94 (s)                                                    | 119.8                     |
| 6a                 |                                                             | 129.2 <sup>c</sup>        |
| 7                  | 7.80 (s)                                                    | 111.0                     |
| 8                  |                                                             | 153.7                     |
| 9                  |                                                             | 128.3                     |
| 9-CO               |                                                             | 167.3                     |
| 9-OCH <sub>3</sub> | 3.89 (s)                                                    | 55.5                      |
| 10                 |                                                             | 136.9                     |
| 10-CH <sub>3</sub> | 2.77 (s)                                                    | 20.6                      |
| 10a                |                                                             | 120.2 <sup>c</sup>        |
| 11                 |                                                             | 166.0                     |
| 11-OH              | 13.83 (br s)                                                |                           |
| 11a                |                                                             | 109.3                     |
| 12                 |                                                             | 193.7 <sup>b</sup>        |
| 12a-OH             | 6.09 (s)                                                    |                           |
| 12a                |                                                             | 85.1 <sup>a</sup>         |
| 1'                 | 5.88 (dd, $J = 12; 2$ Hz) <sup>*</sup>                      | 94.5                      |
| 2'ax               | 1.90 - 2.10 (m, compl.) <sup>#</sup>                        | 35.1 <sup>d</sup>         |
| 2'eq               | 1.90 - 2.10 (m, compl.) <sup>#</sup>                        |                           |

|       |                                             |                   |
|-------|---------------------------------------------|-------------------|
| 3'ax  | 1.82 (m, compl.) <sup>#</sup>               | 26.8 <sup>d</sup> |
| 3'eq  | 1.63 (dddd, $J = 17; 5; 5; 5$ )             |                   |
| 4'    | 3.15 (dddd, $J = 10; 10; 6.5; 5$ Hz)        | 52.7              |
| 4'-OH | 4.71 (d, $J = 6.5$ Hz)                      |                   |
| 5'    | 3.39 (dq, $J = 6.5; 5$ Hz) <sup>&amp;</sup> | 64.9              |
| 6'    | 1.06 (d, $J = 6.5$ Hz)                      | 18.0              |

br = broad; \* coupling constants are not exact due to overlap with 4-OH; <sup>#</sup>compl. = complex due to overlap with other signals; <sup>&</sup> partly obscured by water signal; <sup>a,b,c,d</sup> assignments mutually interchangeable

### 8-Demethyl-8- $\alpha$ -L-amicetosyl-tetracenomycin C (**3**)

Yield: 7 mg;  $R_{\text{rel}}$  = 4.33 min (analytical HPLC-MS)

MW = 572 g/mol ( $\text{C}_{28}\text{H}_{28}\text{O}_{13}$ )

Positive mode APCI-MS (from HPLC-MS):  $m/z$  = 573 (5%,  $\text{M}+\text{H}^+$ ); 459 (100%, aglycon), 441 (70%), 423 (30%), 409 (30%), 346 (90%), 313 (25%).

UV maxima (from HPLC-diode array): 240 nm (60%), 287 nm (100%), 390 nm (35%), 412 nm (35%)

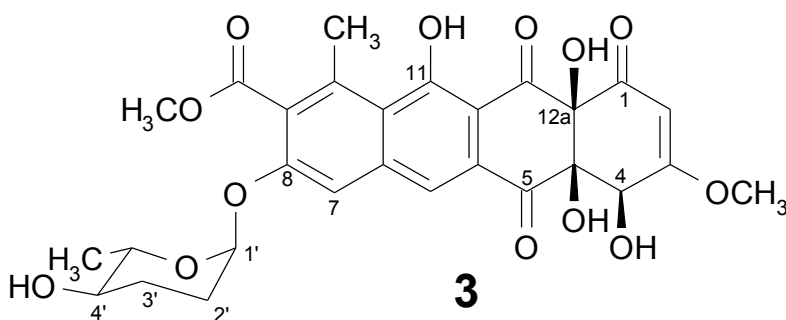

NMR data of 8-Demethyl-8- $\alpha$ -L-amicetosyl-tetracenomycin C **3**. Given are  $\delta$ -values in ppm relative to TMS, in  $d_6$ -DMSO.

| compound           | $^1\text{H}$ (400 MHz)     | $^{13}\text{C}$ (100 MHz) |
|--------------------|----------------------------|---------------------------|
| <b>3</b>           |                            |                           |
| 1                  |                            | 190.9                     |
| 2                  | 5.48 (d, $J$ = 1.5 Hz)     | 100.4                     |
| 3                  |                            | 172.9                     |
| 3-OCH <sub>3</sub> | 3.70 (s)                   | 56.6                      |
| 4-H                | 4.77 (dd, $J$ = 8; 1.5 Hz) | 71.0                      |
| 4-OH               | 5.89 (d, $J$ = 8 Hz)       |                           |
| 4a                 |                            | 87.3 <sup>a</sup>         |
| 4a-OH              | n.o. <sup>*</sup>          |                           |
| 5                  |                            | 192.9 <sup>b</sup>        |
| 5a                 |                            | 139.7                     |
| 6                  | 7.94 (s)                   | 119.8                     |
| 6a                 |                            | 129.1 <sup>c</sup>        |
| 7                  | 7.82 (s)                   | 111.0                     |
| 8                  |                            | 153.7                     |
| 9                  |                            | 127.5                     |
| 9-CO               |                            | 167.0                     |
| 9-OCH <sub>3</sub> | 3.91 (s)                   | 55.5                      |
| 10                 |                            | 136.9                     |

|                    |                                                         |                    |
|--------------------|---------------------------------------------------------|--------------------|
| 10-CH <sub>3</sub> | 2.79 (s)                                                | 20.6               |
| 10a                |                                                         | 120.2 <sup>c</sup> |
| 11                 |                                                         | 165.7              |
| 11-OH              | 13.81 (br s)                                            |                    |
| 11a                |                                                         | 109.2              |
| 12                 |                                                         | 196.1 <sup>b</sup> |
| 12a-OH             | 6.13 (s)                                                |                    |
| 12a                |                                                         | 85.1 <sup>a</sup>  |
| 1'                 | 5.91 (s)                                                | 94.0               |
| 2'ax               | 1.85 - 2.00 (m, compl.) <sup>#</sup>                    | 28.7 <sup>d</sup>  |
| 2'eq               | 1.85 - 2.00 (m, compl.) <sup>#</sup>                    |                    |
| 3'ax               | 1.82 (m, compl.) <sup>#</sup>                           | 26.8 <sup>d</sup>  |
| 3'eq               | 1.62 (dddd, <i>J</i> = 17; 5; 5; 5 Hz)                  |                    |
| 4'                 | 3.14 (dddd, <i>J</i> = 10; 10; 5; 5 Hz)                 | 52.5               |
| 4'-OH              | 5.01 (d, <i>J</i> = 5 Hz)                               |                    |
| 5'                 | 3.40 (dq, <i>J</i> = 6.5, 5 Hz, obsc.) <sup>&amp;</sup> | 69.9               |
| 6'                 | 1.05 (d, <i>J</i> = 6.5 Hz)                             | 18.1               |

br = broad; <sup>a</sup> n.o. = not observed; <sup>#</sup> compl. = complex, due to overlap with other signals; <sup>&</sup> partly obscured by water signal; <sup>a,b,c,d</sup> assignmanets mutually interchangeable

## References

- (8) Fernández, E., Weissbach, U., Reillo, C. S., Braña, A. F., Méndez, C., Rohr, J., Salas, J. A. *J. Bacteriol.* **1998**, *180*, 4929-4937.
- (9) Aguirrezabalaga, I., Olano, C., Allende, N., Rodriguez, L., Braña, A. F., Méndez, C., Salas, J.A. *Ag. Chemother.* **2000**, *44*, 1266-1275.
- (10) Kieser, T., Bibb, M. J., Buttner, M. J., Chater, K. F., Hopwood, D. A. *The John Innes Foundation. Norwich. England.* **2000**.
- (11) Sambrook J., Russell D.W., Sambrook J. *Cold Spring Harbor Laboratory.* **2001**.
- (12) Sanger, F., Nicklen, S., Coulson, A. R. *Proc. Natl. Acad. Sci. (USA)* **1977**, *74*, 5463-5467.
- (13) Devereux, J., Haeberli, P., Smithies, O. *Nucleic Acid Res.* **1984**, *12*, 387-395.
- (14) Altschul, S. F. Gish, W., Miller, W., Myers, E. W., Lipman, D. J. *J. Mol. Biol.* **1990**, *215*, 403-410.
